# Supplementary material for: Global evolution of flux transfer events along the magnetopause from the dayside to the far tail
Source: Copernicus journal article supplement (doi:10.5194/angeo-43-469-2025), 2025-08-28
Supplement: Supplementary file 1 [file angeo-43-469-2025-supplement.zip]

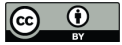

*Supplement of*

**Global evolution of flux transfer events along the magnetopause from the dayside to the far tail**

**Yann Pfau-Kempf et al.**

*Correspondence to:* Yann Pfau-Kempf ([yann.pfau-kempf@csc.fi](mailto:yann.pfau-kempf@csc.fi))

- [angeo-43-469-2025-supplement-title-page.pdf](#)
- [Animation S1.mp4](#)
- [Animation S2.mp4](#)

The copyright of individual parts of the supplement might differ from the article licence.
